# Supplementary material
Source: publisher figshare collection journal article supplement (https://acs.figshare.com/ndownloader/files/4117873)
Supplement: Supplementary file 1 [file 4117873]

# **Supporting Information for**

## **Hybrid Solar Cells with Outstanding Short-Circuit Currents**

### **Based on a Room Temperature Soft-Chemical Strategy: the**

#### **Case of P3HT:Ag<sub>2</sub>S**

Yan Lei,<sup>†,‡</sup> Huimin Jia,<sup>†</sup> Weiwei He,<sup>†</sup> Yange Zhang,<sup>†</sup> Liwei Mi,<sup>†</sup> Hongwei Hou,<sup>‡</sup> Guangshan Zhu,<sup>†,δ</sup> and Zhi Zheng<sup>\*,†</sup>

<sup>†</sup>Key Laboratory of Micro-Nano Materials for Energy Storage and Conversion of Henan Province and Institute of Surface Micro and Nano Materials, Xuchang University Henan 461000, China

<sup>‡</sup>Department of Chemistry, Zhengzhou University Zhengzhou 450000, China

<sup>δ</sup>State Key Laboratory of Inorganic Synthesis and Preparative Chemistry, Jilin University Changchun 130012, China

\*Authors to whom correspondence should be addressed. E- mail: zhengzhi99999@gmail.com

#### **Experimental Details**

All of the reactants were commercial available. First, to avoid local short circuits, 15Ωcm<sup>-2</sup> ITO substrate was etched to form an insulate gap by photoengraving. Second, the ITO substrates with a insulate gap was cleaned in solution of detergent and water, mixed NH<sub>3</sub>·H<sub>2</sub>O:H<sub>2</sub>O<sub>2</sub>:H<sub>2</sub>O (volume ratio, 1:2:5) solution and distilled water, orderly. After that, the ITO substrate was dried at 120°C for 2h. A 250 nm silver layer was coated on the ITO substrate by magnetron sputtering in the present of a mask. The pressure in the chamber was about 7.0× 10<sup>-3</sup> mbar.

The above silver film on the ITO substrate and 0.01g sulfur powders were put into a 20ml vessel, then 15ml N,N-dimethylformamide (DMF) was added. The container

was maintained at 25 °C for 8h, after that a black thin film on the ITO substrate was obtained. This thin film was washed with ethanol for several times, and dried in the vacuum drying oven at 80°C for 24h.

The Ag<sub>2</sub>S thin film on the ITO substrate was spin-coated with P3HT (Aldrich: regioregular with an average molecular weight, MW=87000) in chloroform or chlorobenzene solution (10mgmL<sup>-1</sup>), then dried at room temperature in glove-box for 24h. Top gold electrode was thermally evaporated on the film through a shadow mask at a pressure around  $9.0 \times 10^{-5}$  mbar. Finally, a hybrid solar cell device with a  $\sim 0.15 \text{ cm}^2$  active area was obtained.

## **Characterization**

The obtained thin film was characterized by X-ray diffraction (XRD, Bruker D8 Advance diffractometer) with nickel-filtered CuK $\alpha$  radiation. Morphology of the film was investigated by scanning electron microscopy (SEM, Hitachi S-4800) and atomic force microscope (AFM, Veeco Digital Instruments, Nanoscope IIIId). High-resolution transmission electron microscopy (HRTEM) data were obtained from a JEM-2100 transmission electron microscopy (TEM). The samples for TEM analysis were prepared by dispersing the powders scraped from the Ag<sub>2</sub>S film in ethanol. The photovoltaic performance of the hybrid solar cell device was measured under illumination of AM 1.5G 100mW/cm<sup>2</sup> by using a solar simulator (Newport Inc.). Quantum efficiency data were recorded from Newport QE system, and the Uv-Vis spectrum was obtained from Cary 5000 Uv-Vis-NIR.

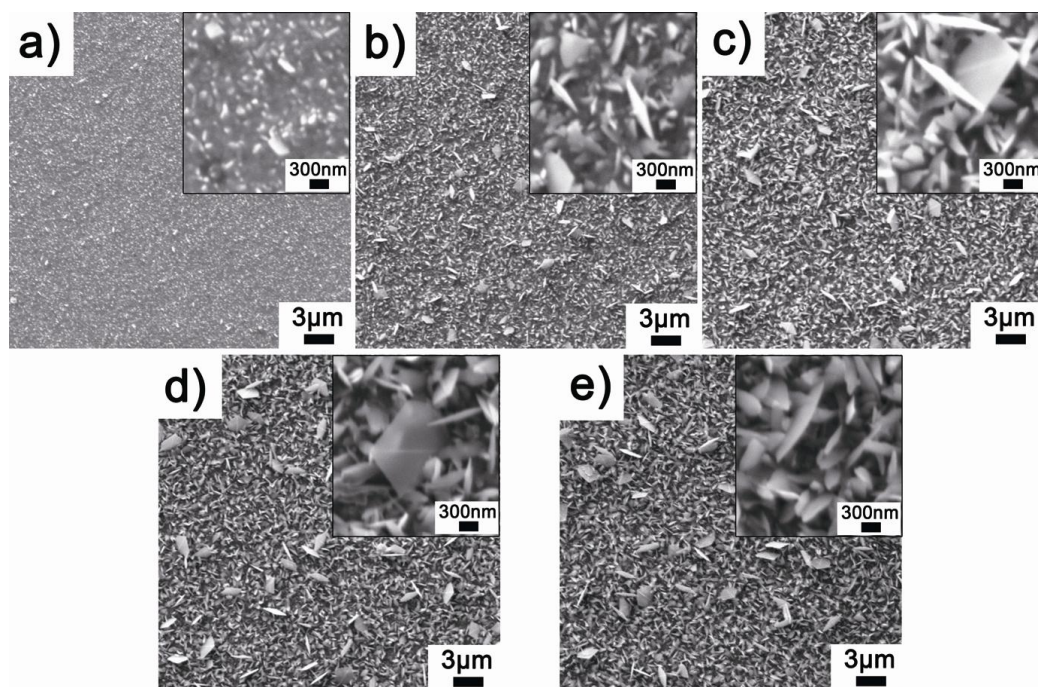

**Figure S1.** Growth process of the  $\text{Ag}_2\text{S}$  nanocrystal on ITO substrate at  $25^\circ\text{C}$ .  
a) 2h; b) 4h; c) 6h; d) 8h; e) 10h.

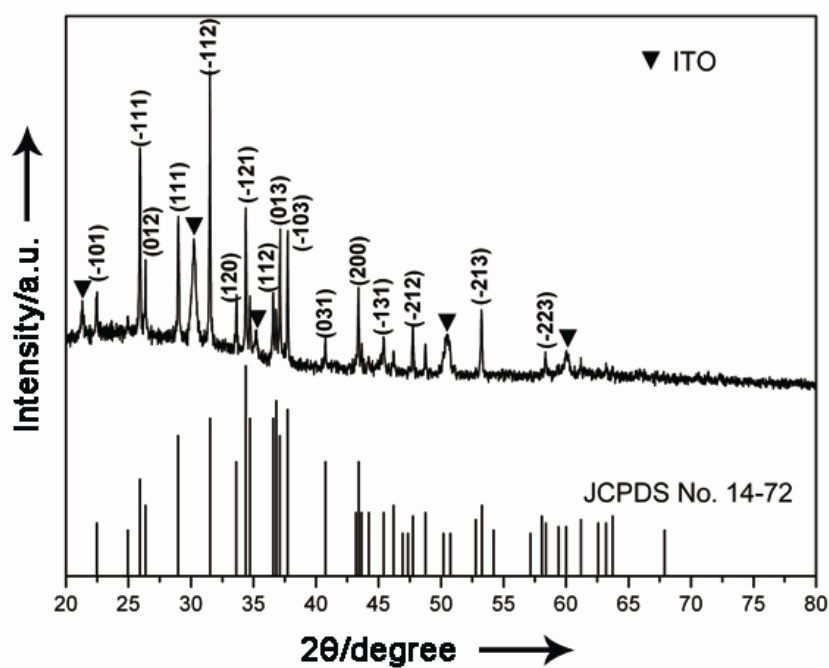

**Figure S2.** XRD patterns of  $\text{Ag}_2\text{S}$  nanosheet film and the standard data.

Figure S2 shows the X-ray diffraction (XRD) pattern of the resulting  $\text{Ag}_2\text{S}$  thin film on the ITO substrate, the diffraction peaks can be well indexed with standard data of the  $\text{Ag}_2\text{S}$  ( JCPDS File No. 14-72, monoclinic), all other diffraction peaks come from the ITO substrate.

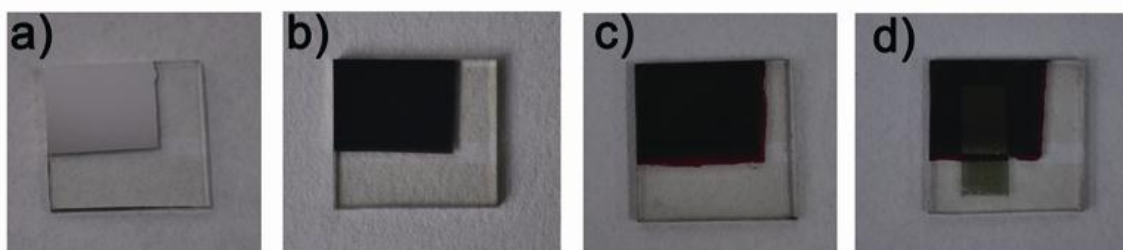

**Figure S3.** Photographs of a) Ag thin film; b)  $\text{Ag}_2\text{S}$  thin film; c) P3HT: $\text{Ag}_2\text{S}$  composite thin film on patterned ITO substrate; d) hybrid solar cell model based on P3HT: $\text{Ag}_2\text{S}$ .

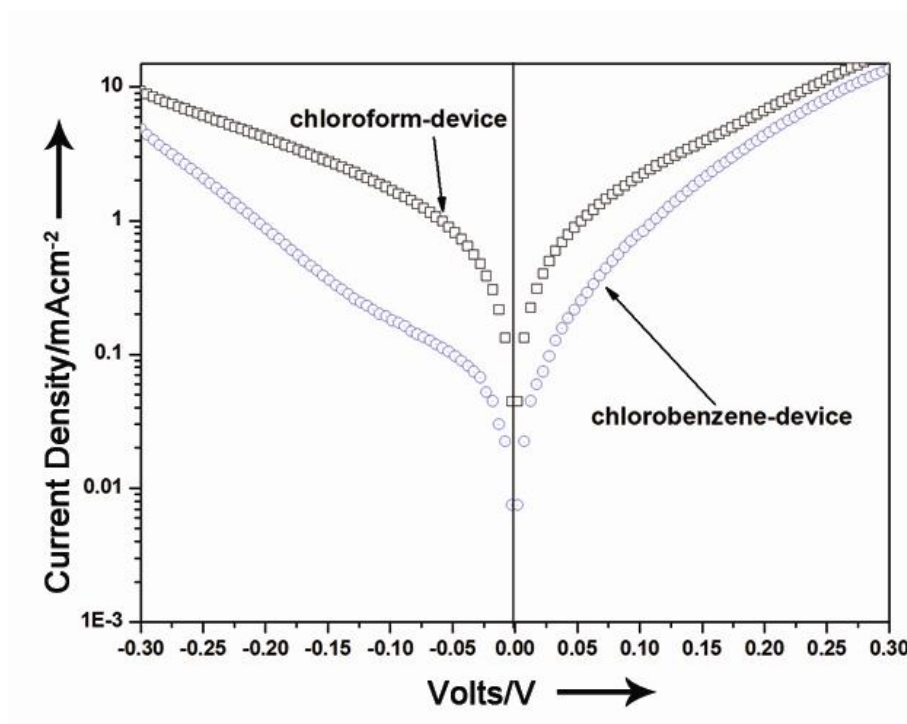

**Figure S4.** Dark current density of P3HT: $\text{Ag}_2\text{S}$  hybrid solar cell.

Figure S4 reveals that the dark current of the chloroform-device was higher than chlorobenzene-device, according to eqn (1), the chlorobenzene-device will bring out a higher open voltage.

$$V_{oc} = \frac{nKT}{q} \ln \left( \frac{J_{sc}}{J_0} \right) \quad (1)$$

where,  $n$  is the ideality factor,  $k$  is the Boltzmann constant,  $T$  is the temperature,  $q$  is the charge of an electron,  $J_{sc}$  is the short-circuit current density and  $J_0$  is the saturation current density of the device.

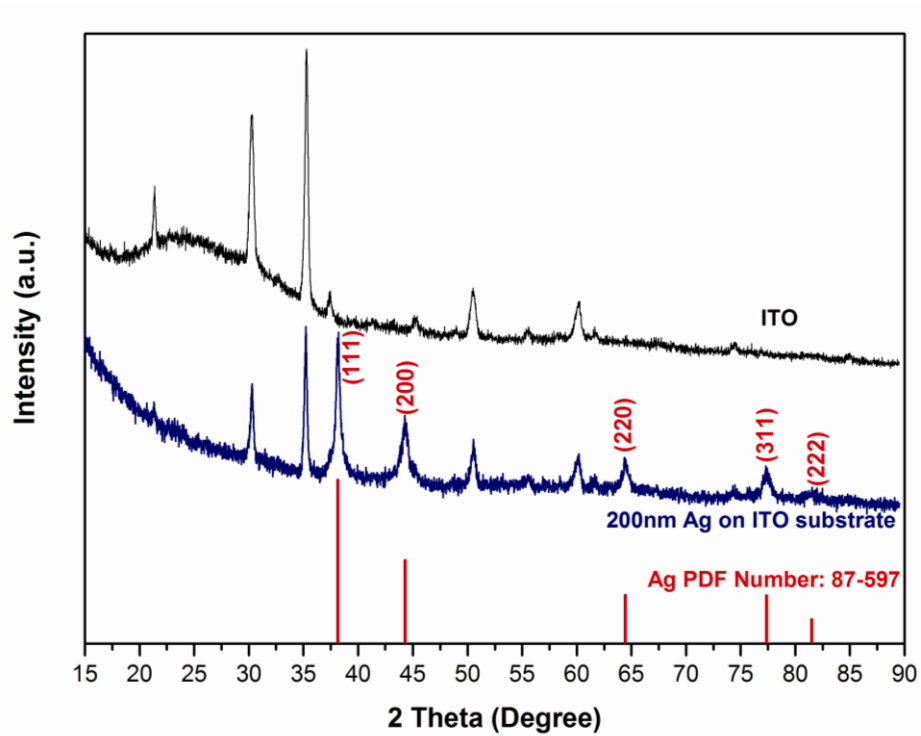

**Figure S5.** XRD pattern of elemental Ag film on ITO substrate after two weeks storage.

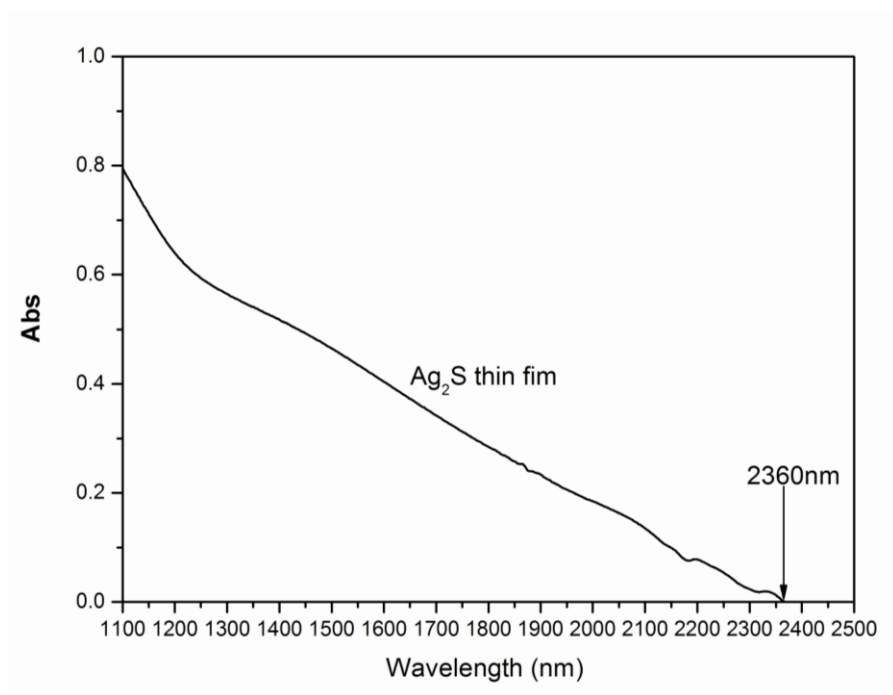

**Figure S6.** The absorption spectrum of Ag<sub>2</sub>S thin film in the near-IR region.

**Table S1** Testing data of P3HT:Ag<sub>2</sub>S hybrid solar cells

| Solvent       | P3HT Concentration<br>(mg/mL) | $V_{oc}$ (V) | $J_{sc}$ (mA/cm <sup>2</sup> ) | FF (%) | PCE (%) |
|---------------|-------------------------------|--------------|--------------------------------|--------|---------|
| Chlorobenzene | 15                            | 0.21         | 9.15                           | 45.37  | 0.89    |
| Chlorobenzene | 5                             |              | Short Circuit                  |        |         |
| Chloroform    | 15                            | 0.13         | 6.19                           | 27.49  | 0.22    |
| Chloroform    | 5                             |              | Short Circuit                  |        |         |

In order to demonstrate the feasibility of our strategy for hybrid thin film solar cell devices, we also added a video file as supporting information, in which we demonstrated that our solar cell model could drive a LED even after 8 months storage in a general desiccator without encapsulation. Please download from the following address: <http://www.gmail.com>

Account: videomail0000

Password: videomail1111
